# Supplementary material for: Probing the common alkali metal affinity of native and variously methylated β-cyclodextrins by combining electrospray-tandem mass spectrometry and molecular modeling
Source: Royal Society of Chemistry journal article supplement (doi:10.1039/c5cp02895g), 2015-01-01
Supplement: c5cp02895g1.pdf [file c5cp02895g1.pdf]

## **Electronic Supplementary Information (ESI)**

# **Probing the common alkali metals affinity of native and variously methylated $\beta$ -cyclodextrins by combining electrospray-tandem mass spectrometry and molecular modeling**

Cédric Przybylski,<sup>a\*</sup> Véronique Bonnet<sup>b</sup> and Christine Cézard<sup>b</sup>

<sup>a</sup> Université d'Evry-Val-d'Essonne, Laboratoire Analyse et Modélisation pour la Biologie et l'Environnement, CNRS UMR 8587, Bâtiment Maupertuis, Bld F. Mitterrand, F-91025 Evry, France

E-mail: [cedric.przybylski@univ-evry.fr](mailto:cedric.przybylski@univ-evry.fr)

<sup>b</sup> Université de Picardie Jules Verne, Laboratoire de Glycochimie, des Antimicrobiens et des Agroressources, CNRS FRE 3517, 80039 Amiens, France.

\*To whom correspondence should be sent: [cedric.przybylski@univ-evry.fr](mailto:cedric.przybylski@univ-evry.fr)

## Table of contents

|                                                                                                                                                                                                                                      |      |
|--------------------------------------------------------------------------------------------------------------------------------------------------------------------------------------------------------------------------------------|------|
| <b>Figure S1.</b> Main equations used for determining energy minimum.                                                                                                                                                                | p.3  |
| <b>Figure S2.</b> Zoom between 15 and 45 % Normalized Collision Energy during Survival Yield experiment on monopotassied RAMEB upon HCD.                                                                                             | p.3  |
| <b>Figure S3.</b> Example of fragmentation pathways for [TRIMEB+Na] <sup>+</sup> upon HCD.                                                                                                                                           | p.4  |
| <b>Table S1.</b> Thermodynamic parameters for the six studied conformers of native $\beta$ -CD.                                                                                                                                      | p.5  |
| <b>Table S2.</b> Thermodynamic parameters for the six studied conformers of per-6-O-methyl $\beta$ -CD (CRYSMEB).                                                                                                                    | p.5  |
| <b>Table S3.</b> Thermodynamic parameters for the six studied conformers of per-3,6dimethyl $\beta$ -CD (RAMEB).                                                                                                                     | p.5  |
| <b>Table S4.</b> Thermodynamic parameters for the six studied conformers of per-2,3-6-trimethyl $\beta$ -CD (TRIMEB).                                                                                                                | p.6  |
| <b>Table S5.</b> Thermodynamic parameters for the six studied conformers of native $\beta$ -CD interacting with one lithium. Basis Set Superposition Errors (BSSE) was indicated in brackets.                                        | p.6  |
| <b>Table S6.</b> Thermodynamic parameters for the six studied conformers of native $\beta$ -CD interacting with one sodium. Basis Set Superposition Errors (BSSE) was indicated in brackets.                                         | p.7  |
| <b>Table S7.</b> Thermodynamic parameters for the six studied conformers of native $\beta$ -CD interacting with one potassium. Basis Set Superposition Errors (BSSE) was indicated in brackets.                                      | p.7  |
| <b>Table S8.</b> Thermodynamic parameters for the six studied conformers of per-6-O-methyl $\beta$ -CD (CRYSMEB) interacting with one lithium. Basis Set Superposition Errors (BSSE) was indicated in brackets.                      | p.8  |
| <b>Table S9.</b> Thermodynamic parameters for the six studied conformers of per-6-O-methyl $\beta$ -CD (CRYSMEB) interacting with one sodium. Basis Set Superposition Errors (BSSE) was indicated in brackets.                       | p.8  |
| <b>Table S10.</b> Thermodynamic parameters for the six studied conformers of per-6-O-methyl $\beta$ -CD (CRYSMEB) interacting with one potassium Basis Set Superposition Errors (BSSE) was indicated in brackets.                    | p.9  |
| <b>Table S11.</b> Thermodynamic parameters for the six studied conformers of per-3,6-O-dimethyl $\beta$ -CD (RAMEB) interacting with one lithium. Basis Set Superposition Errors (BSSE) was indicated in brackets.                   | p.9  |
| <b>Table S12.</b> Thermodynamic parameters for the six studied conformers of per-3,6-O-dimethyl $\beta$ -CD (RAMEB) interacting with one sodium. Basis Set Superposition Errors (BSSE) was indicated in brackets.                    | p.10 |
| <b>Table S13.</b> Thermodynamic parameters for the six studied conformers of per-3,6-O-dimethyl $\beta$ -CD (RAMEB) interacting with one potassium. Basis Set Superposition Errors (BSSE) was indicated in brackets.                 | p.10 |
| <b>Table S14.</b> Thermodynamic parameters for the six studied conformers of per-2,3,6-O-dimethyl $\beta$ -CD (TRIMEB) interacting with one lithium. Basis Set Superposition Errors (BSSE) was indicated in brackets.                | p.11 |
| <b>Table S15.</b> Thermodynamic parameters for the six studied conformers of per-2,3,6-O-dimethyl $\beta$ -CD (TRIMEB) interacting with one sodium. Basis Set Superposition Errors (BSSE) was indicated in brackets.                 | p.11 |
| <b>Table S16.</b> Thermodynamic parameters for the six studied conformers of per-2,3,6-O-dimethyl $\beta$ -CD (TRIMEB) interacting with one potassium. Basis Set Superposition Errors (BSSE) was indicated in brackets.              | p.12 |
| <b>Table S17.</b> Thermodynamic parameters for the six studied conformers of native $\beta$ -CD interacting with two lithium. Basis Set Superposition Errors (BSSE) was indicated in brackets.                                       | p.12 |
| <b>Table S18.</b> Thermodynamic parameters for the six studied conformers of native $\beta$ -CD interacting with one lithium and one sodium. Basis Set Superposition Errors (BSSE) was indicated in brackets.                        | p.13 |
| <b>Table S19.</b> Thermodynamic parameters for the six studied conformers of per-2,3,6-O-dimethyl $\beta$ -CD (TRIMEB) interacting with two lithium. Basis Set Superposition Errors (BSSE) was indicated in brackets.                | p.13 |
| <b>Table S20.</b> Thermodynamic parameters for the six studied conformers of per-2,3,6-O-dimethyl $\beta$ -CD (TRIMEB) interacting with one lithium and one sodium. Basis Set Superposition Errors (BSSE) was indicated in brackets. | p.14 |

- $E_0 = E_{\text{elect}} + \text{ZPE}$  Zero Point Energy at 0 K
- $E = E_0 + E_{\text{trans}} + E_{\text{rot}} + E_{\text{vib}}$  (thermal correction from 0 K to 298 K)

With :  $E_{\text{elect}}$  = Energy contributions from electronic motion  
 $E_{\text{trans}}$  = Energy contributions from translation motion  
 $E_{\text{rot}}$  = Energy contributions from rotational motion  
 $E_{\text{vib}}$  = Energy contributions from vibrational motion  
 ZPE = zero-point energy as energy vibrational occurring even at 0 K

- Gibbs free energy :  $G = H - TS$  with thermal correction :  $H = E + RT$

With :  $H$  = enthalpy (K)  
 $R$  = ideal gas constant  $1.9872041 \text{ cal.K}^{-1}.\text{mol}^{-1}$   
 $T$  = temperature (K)  
 $S$  = entropy ( $\text{cal.K}^{-1}$ )

Fig. S1 Main equations used for determining energy minimum.

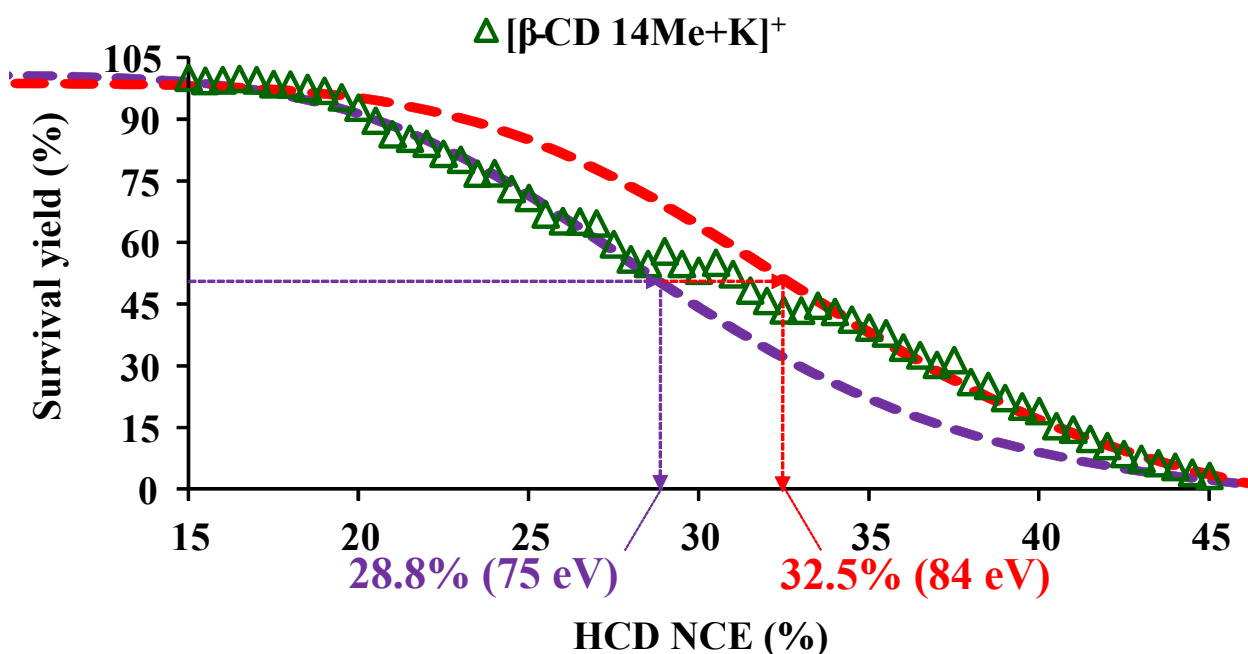

Fig. S2 Zoom between 15 and 45 % Normalized Collision Energy during Survival Yield experiment on monopotassiated RAMEB (taking into account 14 methyl groups) upon HCD. We formulated hypothesis that curve obtained for this experiment (green triangle) (see Table 2 in article, not shown here) resulting in 30.2% (72 eV) as  $\text{CE}_{50}$  is an average of two sigmoid representing two region-isomers of dimethylated  $\beta\text{-CD}$  in the RAMEB : an homogeneous 2,6-O-methyl- $\beta\text{-CD}$  (purple curve) and an heterogeneous of 2,3,6-O-methyl et 6-O-methyl glucose units (red curve) randomly distributed through the one  $\beta\text{-CD}$  molecule for a total of 14 methyl groups (red curve). Extrapolated  $\text{CE}_{50}$  values for  $[\text{M} + \text{K}]^+$  led to 28.8% (75 eV), and 32.5% (84 eV), respectively.

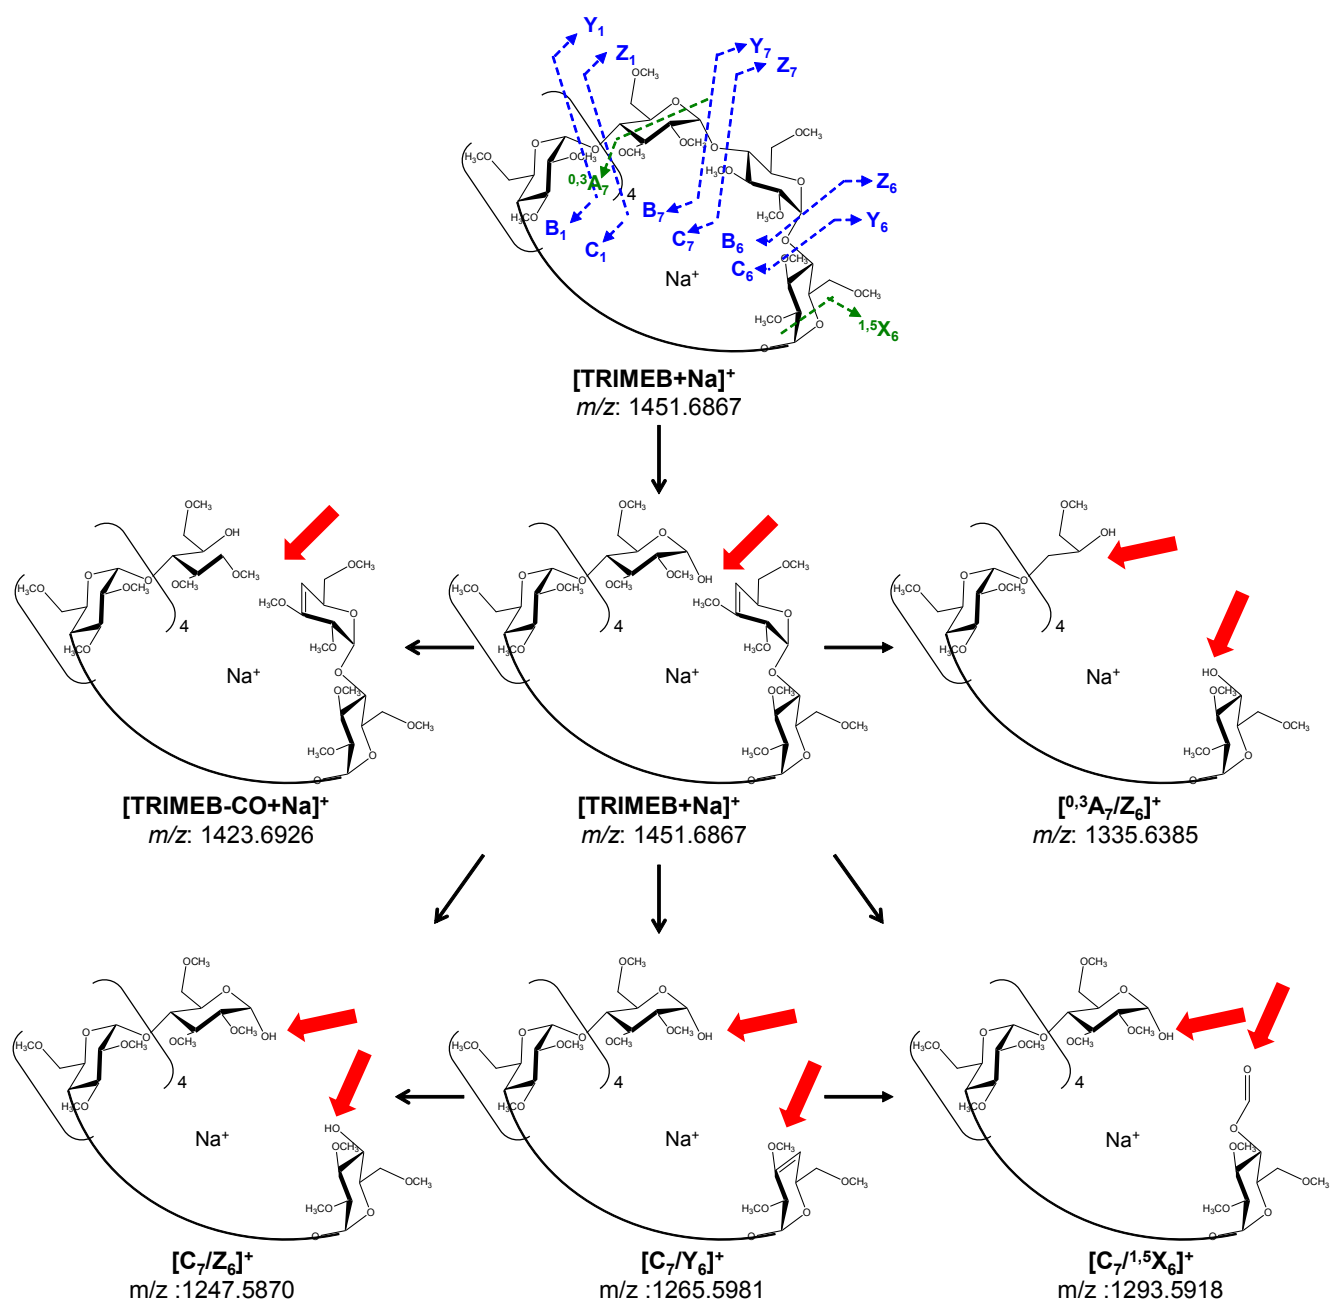

**Figure S3.** Example of fragmentation pathways for  $[\text{TRIMEB}+\text{Na}]^+$  upon HCD.

| Conformation | $\Delta E_{\text{élect}}$<br>kcal.mol <sup>-1</sup> | $\Delta E_0$<br>kcal.mol <sup>-1</sup> | $\Delta E$<br>kcal.mol <sup>-1</sup> | $\Delta H$<br>kcal.mol <sup>-1</sup> | $\Delta G$<br>kcal.mol <sup>-1</sup> |
|--------------|-----------------------------------------------------|----------------------------------------|--------------------------------------|--------------------------------------|--------------------------------------|
| CCCC         | 0,13                                                | 0,17                                   | 0,08                                 | 0,08                                 | 0,35                                 |
| CCCW         | 2,91                                                | 2,27                                   | 2,48                                 | 2,48                                 | 2,37                                 |
| CWCC         | 0,00                                                | 0,00                                   | 0,00                                 | 0,00                                 | 0,00                                 |
| CWCW         | 2,71                                                | 1,85                                   | 2,21                                 | 2,21                                 | 1,56                                 |
| O_CCCC       | 20,28                                               | 17,33                                  | 18,91                                | 18,91                                | 12,40                                |
| O_CWCW       | 17,93                                               | 17,38                                  | 17,64                                | 17,64                                | 16,09                                |

**Table S1.** Thermodynamic parameters for the six studied conformers of native  $\beta$ -CD.

| Conformation | $\Delta E_{\text{élect}}$<br>kcal.mol <sup>-1</sup> | $\Delta E_0$<br>kcal.mol <sup>-1</sup> | $\Delta E$<br>kcal.mol <sup>-1</sup> | $\Delta H$<br>kcal.mol <sup>-1</sup> | $\Delta G$<br>kcal.mol <sup>-1</sup> |
|--------------|-----------------------------------------------------|----------------------------------------|--------------------------------------|--------------------------------------|--------------------------------------|
| CCCC         | 15,38                                               | 14,83                                  | 15,11                                | 15,11                                | 12,91                                |
| CCCW         | 13,75                                               | 14,30                                  | 13,76                                | 13,76                                | 16,75                                |
| CWCC         | 15,04                                               | 14,80                                  | 14,36                                | 14,36                                | 15,12                                |
| CWCW         | 12,78                                               | 13,64                                  | 13,01                                | 13,01                                | 16,08                                |
| O_CCCC       | 14,35                                               | 13,30                                  | 14,00                                | 14,00                                | 9,87                                 |
| O_CWCW       | 0,00                                                | 0,00                                   | 0,00                                 | 0,00                                 | 0,00                                 |

**Table S2.** Thermodynamic parameters for the six studied conformers of per-6-O-methyl  $\beta$ -CD (CRYSMEB).

| Conformation | $\Delta E_{\text{élect}}$<br>kcal.mol <sup>-1</sup> | $\Delta E_0$<br>kcal.mol <sup>-1</sup> | $\Delta E$<br>kcal.mol <sup>-1</sup> | $\Delta H$<br>kcal.mol <sup>-1</sup> | $\Delta G$<br>kcal.mol <sup>-1</sup> |
|--------------|-----------------------------------------------------|----------------------------------------|--------------------------------------|--------------------------------------|--------------------------------------|
| CCCC         | 63,24                                               | 63,64                                  | 63,90                                | 63,90                                | 64,83                                |
| CCCW         | 61,59                                               | 62,95                                  | 62,70                                | 62,70                                | 67,02                                |
| CWCC         | 11,64                                               | 11,99                                  | 11,94                                | 11,94                                | 13,34                                |
| CWCW         | 15,91                                               | 16,51                                  | 16,17                                | 16,17                                | 17,70                                |
| O_CCCC       | 62,57                                               | 62,90                                  | 63,13                                | 63,13                                | 64,95                                |
| O_CWCW       | 0,00                                                | 0,00                                   | 0,00                                 | 0,00                                 | 0,00                                 |

**Table S3.** Thermodynamic parameters for the six studied conformers of per-3,6dimethyl  $\beta$ -CD (RAMEB).

| Conformation | $\Delta E_{\text{élect}}$<br>kcal.mol <sup>-1</sup> | $\Delta E_0$<br>kcal.mol <sup>-1</sup> | $\Delta E$<br>kcal.mol <sup>-1</sup> | $\Delta H$<br>kcal.mol <sup>-1</sup> | $\Delta G$<br>kcal.mol <sup>-1</sup> |
|--------------|-----------------------------------------------------|----------------------------------------|--------------------------------------|--------------------------------------|--------------------------------------|
| CCCC         | 41,19                                               | 43,88                                  | 42,76                                | 42,76                                | 47,63                                |
| CCCW         | 35,40                                               | 37,44                                  | 36,66                                | 36,66                                | 39,31                                |
| CWCC         | 9,72                                                | 9,84                                   | 10,09                                | 10,09                                | 9,86                                 |
| CWCW         | 20,02                                               | 20,28                                  | 19,93                                | 19,93                                | 20,20                                |
| O_CCCC       | 34,21                                               | 36,30                                  | 35,57                                | 35,57                                | 38,58                                |
| O_CWCW       | 0,00                                                | 0,00                                   | 0,00                                 | 0,00                                 | 0,00                                 |

**Table S4.** Thermodynamic parameters for the six studied conformers of per-2,3-6-trimethyl  $\beta$ -CD (TRIMEB).

| Conformation | $\Delta E_{\text{élect}}$<br>kcal.mol <sup>-1</sup> | $\Delta E_0$<br>kcal.mol <sup>-1</sup> | $\Delta E$<br>kcal.mol <sup>-1</sup> | $\Delta H$<br>kcal.mol <sup>-1</sup> | $\Delta G$<br>kcal.mol <sup>-1</sup> | BSSE |
|--------------|-----------------------------------------------------|----------------------------------------|--------------------------------------|--------------------------------------|--------------------------------------|------|
| CCCC         | 7,13                                                | 7,23                                   | 7,05                                 | 7,05                                 | 7,70                                 | 7,61 |
| CCCW         | 6,07                                                | 6,65                                   | 6,18                                 | 6,18                                 | 7,54                                 | 8,04 |
| CWCC         | 0,00                                                | 0,00                                   | 0,00                                 | 0,00                                 | 0,00                                 | 8,06 |
| CWCW         | 2,71                                                | 3,84                                   | 3,52                                 | 3,52                                 | 4,23                                 | 8,04 |
| O_CCCC       | 20,28                                               | 14,42                                  | 15,10                                | 15,10                                | 12,46                                | 7,41 |
| O_CWCW       | 17,97                                               | 31,49                                  | 31,19                                | 31,19                                | 31,05                                | 5,20 |

| Conformation | $E_{\text{int}}^{\text{élect}}$<br>kcal.mol <sup>-1</sup> | $E_{\text{int}}^0$<br>kcal.mol <sup>-1</sup> | $\Delta G_{\text{int}}$<br>kcal.mol <sup>-1</sup> |
|--------------|-----------------------------------------------------------|----------------------------------------------|---------------------------------------------------|
| CCCC         | -91,05 (+7,61)                                            | -90,09 (+7,61)                               | -82,77 (+7,61)                                    |
| CCCW         | -94,89 (+8,04)                                            | -92,77 (+8,04)                               | -84,94 (+8,04)                                    |
| CWCC         | -98,05 (+8,06)                                            | -97,15 (+8,06)                               | -90,12 (+8,06)                                    |
| CWCW         | -97,47 (+8,04)                                            | -95,16 (+8,04)                               | -87,95 (+8,04)                                    |
| O_CCCC       | -102,53 (+7,41)                                           | -100,06 (+7,41)                              | -90,06 (+7,41)                                    |
| O_CWCW       | -84,90 (+5,20)                                            | -83,04 (+5,20)                               | -75,15 (+5,20)                                    |

**Table S5.** Thermodynamic parameters for the six studied conformers of native  $\beta$ -CD interacting with one lithium. Basis Set Superposition Errors (BSSE) was indicated in brackets.

| Conformation | $\Delta E_{\text{elect}}$<br>kcal.mol <sup>-1</sup> | $\Delta E_0$<br>kcal.mol <sup>-1</sup> | $\Delta E$<br>kcal.mol <sup>-1</sup> | $\Delta H$<br>kcal.mol <sup>-1</sup> | $\Delta G$<br>kcal.mol <sup>-1</sup> | BSSE |
|--------------|-----------------------------------------------------|----------------------------------------|--------------------------------------|--------------------------------------|--------------------------------------|------|
| CCCC         | 5,59                                                | 5,54                                   | 5,42                                 | 5,42                                 | 5,83                                 | 8,33 |
| CCCW         | 7,85                                                | 7,86                                   | 7,69                                 | 7,69                                 | 8,24                                 | 8,46 |
| CWCC         | 0,00                                                | 0,00                                   | 0,00                                 | 0,00                                 | 0,00                                 | 8,97 |
| CWCW         | 5,52                                                | 5,34                                   | 5,36                                 | 5,36                                 | 5,18                                 | 8,48 |
| O_CCCC       | 13,76                                               | 12,24                                  | 12,96                                | 12,96                                | 9,86                                 | 8,00 |
| O_CWCW       | 16,00                                               | 16,08                                  | 15,99                                | 15,99                                | 15,05                                | 7,23 |

  

| Conformation | $E_{\text{int}}^{\text{elect}}$<br>kcal.mol <sup>-1</sup> | $E_{\text{int}}^0$ kcal.mol <sup>-1</sup> | $\Delta G_{\text{int}}$ kcal.mol <sup>-1</sup> |
|--------------|-----------------------------------------------------------|-------------------------------------------|------------------------------------------------|
| CCCC         | -67,25 (+8,33)                                            | -67,53 (+8,33)                            | -60,40 (+8,33)                                 |
| CCCW         | -67,78 (+8,46)                                            | -67,30 (+8,46)                            | -60,01 (+8,46)                                 |
| CWCC         | -72,72 (+8,97)                                            | -72,89 (+8,97)                            | -65,88 (+8,97)                                 |
| CWCW         | -69,90 (+8,48)                                            | -69,40 (+8,48)                            | -62,27 (+8,48)                                 |
| O_CCCC       | -79,24 (+8,00)                                            | -77,98 (+8,00)                            | -68,42 (+8,00)                                 |
| O_CWCW       | -74,69 (+7,23)                                            | -74,19 (+7,23)                            | -66,92 (+7,23)                                 |

**Table S6.** Thermodynamic parameters for the six studied conformers of native  $\beta$ -CD interacting with one sodium. Basis Set Superposition Errors (BSSE) was indicated in brackets.

| Conformation | $\Delta E_{\text{elect}}$<br>kcal.mol <sup>-1</sup> | $\Delta E_0$<br>kcal.mol <sup>-1</sup> | $\Delta E$<br>kcal.mol <sup>-1</sup> | $\Delta H$<br>kcal.mol <sup>-1</sup> | $\Delta G$<br>kcal.mol <sup>-1</sup> | BSSE |
|--------------|-----------------------------------------------------|----------------------------------------|--------------------------------------|--------------------------------------|--------------------------------------|------|
| CCCC         | 4,29                                                | 4,38                                   | 4,22                                 | 4,22                                 | 4,98                                 | 7,82 |
| CCCW         | 6,24                                                | 6,31                                   | 6,16                                 | 6,16                                 | 6,79                                 | 7,96 |
| CWCC         | 0,00                                                | 0,00                                   | 0,00                                 | 0,00                                 | 0,00                                 | 8,79 |
| CWCW         | 3,85                                                | 3,98                                   | 3,92                                 | 3,92                                 | 4,18                                 | 8,02 |
| O_CCCC       | 2,19                                                | 2,03                                   | 2,07                                 | 2,07                                 | 2,77                                 | 8,74 |
| O_CWCW       | 13,26                                               | 14,19                                  | 13,70                                | 13,70                                | 15,15                                | 6,10 |

  

| Conformation | $E_{\text{int}}^{\text{elect}}$<br>kcal.mol <sup>-1</sup> | $E_{\text{int}}^0$ kcal.mol <sup>-1</sup> | $\Delta G_{\text{int}}$ kcal.mol <sup>-1</sup> |
|--------------|-----------------------------------------------------------|-------------------------------------------|------------------------------------------------|
| CCCC         | -45,86 (+7,82)                                            | -46,75 (+7,82)                            | -40,55 (+7,82)                                 |
| CCCW         | -46,69 (+7,96)                                            | -46,92 (+7,96)                            | -40,75 (+7,96)                                 |
| CWCC         | -50,02 (+8,79)                                            | -50,96 (+8,79)                            | -45,17 (+8,79)                                 |
| CWCW         | -48,87 (+8,02)                                            | -48,83 (+8,02)                            | -42,55 (+8,02)                                 |
| O_CCCC       | -68,12 (+8,74)                                            | -66,26 (+8,74)                            | -54,80 (+8,74)                                 |
| O_CWCW       | -54,74 (+6,10)                                            | -54,15 (+6,10)                            | -46,11 (+6,10)                                 |

**Table S7.** Thermodynamic parameters for the six studied conformers of native  $\beta$ -CD interacting with one potassium. Basis Set Superposition Errors (BSSE) was indicated in brackets.

| Conformation | $\Delta E_{\text{elect}}$<br>kcal.mol <sup>-1</sup> | $\Delta E_0$<br>kcal.mol <sup>-1</sup> | $\Delta E$<br>kcal.mol <sup>-1</sup> | $\Delta H$<br>kcal.mol <sup>-1</sup> | $\Delta G$<br>kcal.mol <sup>-1</sup> | BSSE |
|--------------|-----------------------------------------------------|----------------------------------------|--------------------------------------|--------------------------------------|--------------------------------------|------|
| CCCC         | 4,24                                                | 3,58                                   | 3,22                                 | 3,22                                 | 3,75                                 | 6,33 |
| CCCW         | 29,66                                               | 29,46                                  | 28,89                                | 28,89                                | 30,28                                | 5,47 |
| CWCC         | 0,66                                                | 1,17                                   | 1,06                                 | 1,06                                 | 1,51                                 | 6,14 |
| CWCW         | 34,07                                               | 33,55                                  | 33,17                                | 33,17                                | 33,15                                | 5,39 |
| o_CCCC       | 0,00                                                | 0,00                                   | 0,00                                 | 0,00                                 | 0,00                                 | 6,20 |
| o_CWCW       | 4,56                                                | 4,97                                   | 4,83                                 | 4,83                                 | 6,40                                 | 6,14 |

  

| Conformation | $E_{\text{int}}^{\text{elect}}$<br>kcal.mol <sup>-1</sup> | $E_{\text{int}}^0$ kcal.mol <sup>-1</sup> | $\Delta G_{\text{int}}$ kcal.mol <sup>-1</sup> |
|--------------|-----------------------------------------------------------|-------------------------------------------|------------------------------------------------|
| CCCC         | -106,33 (+6,33)                                           | -104,25 (+6,33)                           | -93,13 (+6,33)                                 |
| CCCW         | -79,28 (+5,47)                                            | -77,84 (+5,47)                            | -70,45 (+5,47)                                 |
| CWCC         | -109,57 (+6,14)                                           | -106,63 (+6,14)                           | -97,59 (+6,14)                                 |
| CWCW         | -73,90 (+5,39)                                            | -73,08 (+5,39)                            | -66,90 (+5,39)                                 |
| o_CCCC       | -109,54 (+6,20)                                           | -106,30 (+6,20)                           | -93,84 (+6,20)                                 |
| o_CWCW       | -90,63 (+6,14)                                            | -88,03 (+6,14)                            | -77,58 (+6,14)                                 |

**Table S8.** Thermodynamic parameters for the six studied conformers of per-6-O-methyl  $\beta$ -CD (CRYSMEB) interacting with one lithium. Basis Set Superposition Errors (BSSE) was indicated in brackets.

| Conformation | $\Delta E_{\text{elect}}$<br>kcal.mol <sup>-1</sup> | $\Delta E_0$<br>kcal.mol <sup>-1</sup> | $\Delta E$<br>kcal.mol <sup>-1</sup> | $\Delta H$<br>kcal.mol <sup>-1</sup> | $\Delta G$<br>kcal.mol <sup>-1</sup> | BSSE |
|--------------|-----------------------------------------------------|----------------------------------------|--------------------------------------|--------------------------------------|--------------------------------------|------|
| CCCC         | 8,90                                                | 8,53                                   | 8,58                                 | 8,58                                 | 7,11                                 | 6,99 |
| CCCW         | 29,90                                               | 29,73                                  | 29,16                                | 29,16                                | 29,84                                | 6,14 |
| CWCC         | 0,59                                                | 0,85                                   | 0,77                                 | 0,77                                 | 1,12                                 | 7,07 |
| CWCW         | 26,84                                               | 26,66                                  | 26,24                                | 26,24                                | 26,52                                | 6,06 |
| o_CCCC       | 0,00                                                | 0,00                                   | 0,00                                 | 0,00                                 | 0,00                                 | 7,16 |
| o_CWCW       | 5,16                                                | 4,90                                   | 5,04                                 | 5,04                                 | 4,51                                 | 7,39 |

  

| Conformation | $E_{\text{int}}^{\text{elect}}$<br>kcal.mol <sup>-1</sup> | $E_{\text{int}}^0$ kcal.mol <sup>-1</sup> | $\Delta G_{\text{int}}$ kcal.mol <sup>-1</sup> |
|--------------|-----------------------------------------------------------|-------------------------------------------|------------------------------------------------|
| CCCC         | -80,81 (+6,99)                                            | -79,34 (+6,99)                            | -69,11 (+6,99)                                 |
| CCCW         | -58,18 (+6,14)                                            | -57,61 (+6,14)                            | -50,23 (+6,14)                                 |
| CWCC         | -88,78 (+7,07)                                            | -87,00 (+7,07)                            | -77,32 (+7,07)                                 |
| CWCW         | -60,26 (+6,06)                                            | -60,03 (+6,06)                            | -52,88 (+6,06)                                 |
| o_CCCC       | -88,68 (+7,16)                                            | -86,35 (+7,16)                            | -73,19 (+7,16)                                 |
| o_CWCW       | -69,17 (+7,39)                                            | -68,15 (+7,39)                            | -58,81 (+7,39)                                 |

**Table S9.** Thermodynamic parameters for the six studied conformers of per-6-O-methyl  $\beta$ -CD (CRYSMEB) interacting with one sodium. Basis Set Superposition Errors (BSSE) was indicated in brackets.

| Conformation | $\Delta E_{\text{elect}}$<br>kcal.mol <sup>-1</sup> | $\Delta E_0$<br>kcal.mol <sup>-1</sup> | $\Delta E$<br>kcal.mol <sup>-1</sup> | $\Delta H$<br>kcal.mol <sup>-1</sup> | $\Delta G$<br>kcal.mol <sup>-1</sup> | BSSE |
|--------------|-----------------------------------------------------|----------------------------------------|--------------------------------------|--------------------------------------|--------------------------------------|------|
| CCCC         | 2,76                                                | 2,82                                   | 2,83                                 | 2,83                                 | 2,46                                 | 8,27 |
| CCCW         | 27,21                                               | 27,22                                  | 26,55                                | 26,55                                | 27,53                                | 5,88 |
| CWCC         | 0,86                                                | 1,37                                   | 1,18                                 | 1,18                                 | 1,30                                 | 7,29 |
| CWCW         | 20,09                                               | 20,62                                  | 20,04                                | 20,04                                | 21,88                                | 6,90 |
| O_CCCC       | 0,65                                                | 1,14                                   | 0,88                                 | 0,88                                 | 1,35                                 | 7,42 |
| O_CWCW       | 0,00                                                | 0,00                                   | 0,00                                 | 0,00                                 | 0,00                                 | 8,00 |

| Conformation | $E_{\text{int}}^{\text{elect}}$<br>kcal.mol <sup>-1</sup> | $E_{\text{int}}^0$ kcal.mol <sup>-1</sup> | $\Delta G_{\text{int}}$ kcal.mol <sup>-1</sup> |
|--------------|-----------------------------------------------------------|-------------------------------------------|------------------------------------------------|
| CCCC         | -65,30 (+8,27)                                            | -64,24 (+8,27)                            | -53,69 (+8,27)                                 |
| CCCW         | -39,23 (+5,88)                                            | -39,30 (+5,88)                            | -32,47 (+5,88)                                 |
| CWCC         | -66,85 (+7,29)                                            | -65,66 (+7,29)                            | -57,07(+7,29)                                  |
| CWCW         | -45,37 (+6,90)                                            | -45,25 (+6,90)                            | -37,44 (+6,90)                                 |
| O_CCCC       | -66,38 (+7,42)                                            | -64,39 (+7,42)                            | -51,76 (+7,42)                                 |
| O_CWCW       | -52,68 (+8,00)                                            | -52,23 (+8,00)                            | -43,24 (+8,00)                                 |

**Table S10.** Thermodynamic parameters for the six studied conformers of per-6-O-methyl  $\beta$ -CD (CRYSMEB) interacting with one potassium Basis Set Superposition Errors (BSSE) was indicated in brackets.

| Conformation | $\Delta E_{\text{elect}}$<br>kcal.mol <sup>-1</sup> | $\Delta E_0$<br>kcal.mol <sup>-1</sup> | $\Delta E$<br>kcal.mol <sup>-1</sup> | $\Delta H$<br>kcal.mol <sup>-1</sup> | $\Delta G$<br>kcal.mol <sup>-1</sup> | BSSE |
|--------------|-----------------------------------------------------|----------------------------------------|--------------------------------------|--------------------------------------|--------------------------------------|------|
| CCCC         | 52,22                                               | 52,22                                  | 52,45                                | 52,45                                | 54,00                                | 4,47 |
| CCCW         | 69,03                                               | 68,38                                  | 68,79                                | 68,79                                | 69,36                                | 6,37 |
| CWCC         | 0,00                                                | 0,00                                   | 0,00                                 | 0,00                                 | 0,00                                 | 5,59 |
| CWCW         | 15,21                                               | 14,75                                  | 14,57                                | 14,57                                | 15,36                                | 6,12 |
| O_CCCC       | 53,09                                               | 53,24                                  | 53,48                                | 53,48                                | 55,11                                | 5,76 |
| O_CWCW       | 13,79                                               | 13,19                                  | 13,28                                | 13,28                                | 13,12                                | 6,12 |

| Conformation | $E_{\text{int}}^{\text{elect}}$<br>kcal.mol <sup>-1</sup> | $E_{\text{int}}^0$ kcal.mol <sup>-1</sup> | $\Delta G_{\text{int}}$ kcal.mol <sup>-1</sup> |
|--------------|-----------------------------------------------------------|-------------------------------------------|------------------------------------------------|
| CCCC         | -111,10 (+4,47)                                           | -108,20 (+4,47)                           | -97,76 (+4,47)                                 |
| CCCW         | -92,65 (+6,37)                                            | -91,34 (+6,37)                            | -84,60 (+6,37)                                 |
| CWCC         | -111,73 (+5,59)                                           | -108,77 (+5,59)                           | -100,27 (+5,59)                                |
| CWCW         | -100,78 (+6,12)                                           | -98,53 (+6,12)                            | -89,28 (+6,12)                                 |
| O_CCCC       | -109,57 (+5,76)                                           | -106,44 (+5,76)                           | -96,77 (+5,76)                                 |
| O_CWCW       | -86,30 (+6,12)                                            | -83,58 (+6,12)                            | -73,82 (+6,12)                                 |

**Table S11.** Thermodynamic parameters for the six studied conformers of per-3,6-O-dimethyl  $\beta$ -CD (RAMEB) interacting with one lithium. Basis Set Superposition Errors (BSSE) was indicated in brackets.

| Conformation | $\Delta E_{\text{elect}}$<br>kcal.mol <sup>-1</sup> | $\Delta E_0$<br>kcal.mol <sup>-1</sup> | $\Delta E$<br>kcal.mol <sup>-1</sup> | $\Delta H$<br>kcal.mol <sup>-1</sup> | $\Delta G$<br>kcal.mol <sup>-1</sup> | BSSE |
|--------------|-----------------------------------------------------|----------------------------------------|--------------------------------------|--------------------------------------|--------------------------------------|------|
| CCCC         | 51,04                                               | 50,89                                  | 51,20                                | 51,20                                | 51,85                                | 6,58 |
| CCCW         | 53,63                                               | 53,26                                  | 53,52                                | 53,52                                | 54,73                                | 7,32 |
| CWCC         | 0,00                                                | 0,00                                   | 0,00                                 | 0,00                                 | 0,00                                 | 6,90 |
| CWCW         | 20,36                                               | 19,91                                  | 19,71                                | 19,71                                | 19,92                                | 6,13 |
| O_CCCC       | 50,12                                               | 50,20                                  | 50,49                                | 50,49                                | 51,76                                | 6,83 |
| O_CWCW       | 11,61                                               | 11,15                                  | 11,21                                | 11,21                                | 10,07                                | 6,45 |

| Conformation | $E_{\text{int}}^{\text{elect}}$<br>kcal.mol <sup>-1</sup> | $E_{\text{int}}^0$ kcal.mol <sup>-1</sup> | $\Delta G_{\text{int}}$ kcal.mol <sup>-1</sup> |
|--------------|-----------------------------------------------------------|-------------------------------------------|------------------------------------------------|
| CCCC         | -90,02 (+6,58)                                            | -88,40 (+6,58)                            | -77,91 (+6,58)                                 |
| CCCW         | -85,78 (+7,32)                                            | -85,34 (+7,32)                            | -77,21 (+7,32)                                 |
| CWCC         | -89,46 (+6,90)                                            | -87,64 (+6,90)                            | -78,26 (+6,90)                                 |
| CWCW         | -73,36 (+6,13)                                            | -72,25 (+6,13)                            | -62,71 (+6,13)                                 |
| O_CCCC       | -90,26 (+6,83)                                            | -88,35 (+6,83)                            | -78,11 (+6,83)                                 |
| O_CWCW       | -66,21 (+6,45)                                            | -64,50 (+6,45)                            | -54,85 (+6,45)                                 |

**Table S12.** Thermodynamic parameters for the six studied conformers of per-3,6-O-dimethyl  $\beta$ -CD (RAMEB) interacting with one sodium. Basis Set Superposition Errors (BSSE) was indicated in brackets.

| Conformation | $\Delta E_{\text{elect}}$<br>kcal.mol <sup>-1</sup> | $\Delta E_0$<br>kcal.mol <sup>-1</sup> | $\Delta E$<br>kcal.mol <sup>-1</sup> | $\Delta H$<br>kcal.mol <sup>-1</sup> | $\Delta G$<br>kcal.mol <sup>-1</sup> | BSSE |
|--------------|-----------------------------------------------------|----------------------------------------|--------------------------------------|--------------------------------------|--------------------------------------|------|
| CCCC         | 58,20                                               | 58,59                                  | 58,80                                | 58,80                                | 59,68                                | 7,39 |
| CCCW         | 57,25                                               | 56,29                                  | 56,91                                | 56,91                                | 55,83                                | 8,72 |
| CWCC         | 0,00                                                | 0,00                                   | 0,00                                 | 0,00                                 | 0,00                                 | 7,85 |
| CWCW         | 24,89                                               | 24,94                                  | 24,75                                | 24,75                                | 24,87                                | 5,91 |
| O_CCCC       | 57,03                                               | 57,61                                  | 57,88                                | 57,88                                | 59,26                                | 7,25 |
| O_CWCW       | 5,75                                                | 6,23                                   | 5,92                                 | 5,92                                 | 7,73                                 | 7,34 |

| Conformation | $E_{\text{int}}^{\text{elect}}$<br>kcal.mol <sup>-1</sup> | $E_{\text{int}}^0$ kcal.mol <sup>-1</sup> | $\Delta G_{\text{int}}$ kcal.mol <sup>-1</sup> |
|--------------|-----------------------------------------------------------|-------------------------------------------|------------------------------------------------|
| CCCC         | -67,41 (+7,39)                                            | -88,40 (+7,39)                            | -77,91 (+7,39)                                 |
| CCCW         | -66,72 (+8,72)                                            | -85,34 (+8,72)                            | -77,21 (+8,72)                                 |
| CWCC         | -74,01 (+7,85)                                            | -87,64 (+7,85)                            | -78,26 (+7,85)                                 |
| CWCW         | -53,39 (+5,91)                                            | -72,25 (+5,91)                            | -62,71 (+5,91)                                 |
| O_CCCC       | -67,90 (+7,25)                                            | -88,35 (+7,25)                            | -78,11 (+7,25)                                 |
| O_CWCW       | -56,62 (+7,34)                                            | -64,50 (+7,34)                            | -54,85 (+7,34)                                 |

**Table S13.** Thermodynamic parameters for the six studied conformers of per-3,6-O-dimethyl  $\beta$ -CD (RAMEB) interacting with one potassium. Basis Set Superposition Errors (BSSE) was indicated in brackets.

| Conformation | $\Delta E_{\text{elect}}$<br>kcal.mol <sup>-1</sup> | $\Delta E_0$<br>kcal.mol <sup>-1</sup> | $\Delta E$<br>kcal.mol <sup>-1</sup> | $\Delta H$<br>kcal.mol <sup>-1</sup> | $\Delta G$<br>kcal.mol <sup>-1</sup> | BSSE |
|--------------|-----------------------------------------------------|----------------------------------------|--------------------------------------|--------------------------------------|--------------------------------------|------|
| CCCC         | 36,77                                               | 37,83                                  | 37,72                                | 37,72                                | 37,33                                | 5,55 |
| CCCW         | 48,01                                               | 49,26                                  | 48,76                                | 48,76                                | 50,40                                | 5,58 |
| CWCC         | 9,03                                                | 8,17                                   | 8,81                                 | 8,81                                 | 6,84                                 | 4,72 |
| CWCW         | 23,90                                               | 23,09                                  | 23,30                                | 23,30                                | 22,06                                | 5,13 |
| O_CCCC       | 38,15                                               | 39,22                                  | 39,14                                | 39,14                                | 38,33                                | 5,87 |
| O_CWCW       | 0,00                                                | 0,00                                   | 0,00                                 | 0,00                                 | 0,00                                 | 6,32 |

| Conformation | $E_{\text{int}}^{\text{elect}}$<br>kcal.mol <sup>-1</sup> | $E_{\text{int}}^0$ kcal.mol <sup>-1</sup> | $\Delta G_{\text{int}}$ kcal.mol <sup>-1</sup> |
|--------------|-----------------------------------------------------------|-------------------------------------------|------------------------------------------------|
| CCCC         | -115,27 (+5,55)                                           | -113,33 (+5,55)                           | -107,14 (+5,55)                                |
| CCCW         | -98,34 (+5,58)                                            | -95,45 (+5,58)                            | -85,75 (+5,58)                                 |
| CWCC         | -111,61 (+4,72)                                           | -108,95 (+4,72)                           | -99,86 (+4,72)                                 |
| CWCW         | -106,99 (+5,13)                                           | -104,47 (+5,13)                           | -94,99 (+5,13)                                 |
| O_CCCC       | -106,95 (+5,87)                                           | -104,36 (+5,87)                           | -97,08 (+5,87)                                 |
| O_CWCW       | -110,89 (+6,32)                                           | -107,28 (+6,32)                           | -96,84 (+6,32)                                 |

**Table S14.** Thermodynamic parameters for the six studied conformers of per-2,3,6-O-dimethyl  $\beta$ -CD (TRIMEB) interacting with one lithium. Basis Set Superposition Errors (BSSE) was indicated in brackets.

| Conformation | $\Delta E_{\text{elect}}$<br>kcal.mol <sup>-1</sup> | $\Delta E_0$<br>kcal.mol <sup>-1</sup> | $\Delta E$<br>kcal.mol <sup>-1</sup> | $\Delta H$<br>kcal.mol <sup>-1</sup> | $\Delta G$<br>kcal.mol <sup>-1</sup> | BSSE |
|--------------|-----------------------------------------------------|----------------------------------------|--------------------------------------|--------------------------------------|--------------------------------------|------|
| CCCC         | 33,73                                               | 36,00                                  | 35,33                                | 35,33                                | 38,39                                | 6,75 |
| CCCW         | 41,26                                               | 42,99                                  | 42,27                                | 42,27                                | 45,00                                | 6,81 |
| CWCC         | 5,40                                                | 5,34                                   | 5,64                                 | 5,64                                 | 4,93                                 | 6,51 |
| CWCW         | 7,64                                                | 7,79                                   | 7,87                                 | 7,87                                 | 7,34                                 | 7,89 |
| O_CCCC       | 34,58                                               | 36,83                                  | 36,30                                | 36,30                                | 39,10                                | 6,70 |
| O_CWCW       | 0,00                                                | 0,00                                   | 0,00                                 | 0,00                                 | 0,00                                 | 7,56 |

| Conformation | $E_{\text{int}}^{\text{elect}}$<br>kcal.mol <sup>-1</sup> | $E_{\text{int}}^0$ kcal.mol <sup>-1</sup> | $\Delta G_{\text{int}}$ kcal.mol <sup>-1</sup> |
|--------------|-----------------------------------------------------------|-------------------------------------------|------------------------------------------------|
| CCCC         | -95,11 (+6,75)                                            | -93,46 (+6,75)                            | -84,31 (+6,75)                                 |
| CCCW         | -81,88 (+6,81)                                            | -80,03 (+6,81)                            | -69,37 (+6,81)                                 |
| CWCC         | -92,03 (+6,51)                                            | -90,08 (+6,51)                            | -80,00 (+6,51)                                 |
| CWCW         | -100,04 (+7,89)                                           | -98,08 (+7,89)                            | -87,93 (+7,89)                                 |
| O_CCCC       | -87,31 (+6,70)                                            | -85,05 (+6,70)                            | -74,54 (+6,70)                                 |
| O_CWCW       | -87,68 (+7,56)                                            | -85,58 (+7,56)                            | -75,06 (+7,56)                                 |

**Table S15.** Thermodynamic parameters for the six studied conformers of per-2,3,6-O-dimethyl  $\beta$ -CD (TRIMEB) interacting with one sodium. Basis Set Superposition Errors (BSSE) was indicated in brackets.

| Conformation | $\Delta E_{\text{elect}}$<br>kcal.mol <sup>-1</sup> | $\Delta E_0$<br>kcal.mol <sup>-1</sup> | $\Delta E$<br>kcal.mol <sup>-1</sup> | $\Delta H$<br>kcal.mol <sup>-1</sup> | $\Delta G$<br>kcal.mol <sup>-1</sup> | BSSE |
|--------------|-----------------------------------------------------|----------------------------------------|--------------------------------------|--------------------------------------|--------------------------------------|------|
| CCCC         | 34,61                                               | 36,95                                  | 36,16                                | 36,16                                | 39,12                                | 7,20 |
| CCCW         | 43,27                                               | 44,99                                  | 44,25                                | 44,25                                | 46,72                                | 7,58 |
| CWCC         | 7,74                                                | 6,93                                   | 7,56                                 | 7,56                                 | 5,25                                 | 7,19 |
| CWCW         | 0,00                                                | 0,00                                   | 0,00                                 | 0,00                                 | 0,00                                 | 8,52 |
| O_CCCC       | 35,71                                               | 38,14                                  | 37,37                                | 37,37                                | 40,96                                | 7,14 |
| O_CWCW       | 5,68                                                | 5,07                                   | 5,24                                 | 5,24                                 | 3,88                                 | 7,89 |

| Conformation | $E_{\text{int}}^{\text{elect}}$<br>kcal.mol <sup>-1</sup> | $E_{\text{int}}^0$ kcal.mol <sup>-1</sup> | $\Delta G_{\text{int}}$ kcal.mol <sup>-1</sup> |
|--------------|-----------------------------------------------------------|-------------------------------------------|------------------------------------------------|
| CCCC         | -75,19 (+7,20)                                            | -73,99 (+7,20)                            | -65,59 (+7,20)                                 |
| CCCW         | -60,84 (+7,58)                                            | -59,50 (+7,58)                            | -49,68 (+7,58)                                 |
| CWCC         | -70,66 (+7,19)                                            | -69,97 (+7,19)                            | -61,70 (+7,19)                                 |
| CWCW         | -88,65 (+8,52)                                            | -87,34 (+8,52)                            | -77,29 (+8,52)                                 |
| O_CCCC       | -67,15 (+7,14)                                            | -65,21 (+7,14)                            | -54,70 (+7,14)                                 |
| O_CWCW       | -62,97 (+7,89)                                            | -61,99 (+7,89)                            | -53,21 (+7,89)                                 |

**Table S16.** Thermodynamic parameters for the six studied conformers of per-2,3,6-O-dimethyl  $\beta$ -CD (TRIMEB) interacting with one potassium. Basis Set Superposition Errors (BSSE) was indicated in brackets.

| Conformation | $\Delta E_{\text{elect}}$<br>kcal.mol <sup>-1</sup> | $\Delta E_0$<br>kcal.mol <sup>-1</sup> | $\Delta E$<br>kcal.mol <sup>-1</sup> | $\Delta H$<br>kcal.mol <sup>-1</sup> | $\Delta G$<br>kcal.mol <sup>-1</sup> | BSSE  |
|--------------|-----------------------------------------------------|----------------------------------------|--------------------------------------|--------------------------------------|--------------------------------------|-------|
| CCCC         | 2,40                                                | 1,35                                   | 1,70                                 | 1,70                                 | 0,32                                 | 15,70 |
| CCCW         | 2,68                                                | 2,56                                   | 2,57                                 | 2,57                                 | 2,04                                 | 15,60 |
| CWCC         | 22,74                                               | 21,81                                  | 22,09                                | 22,09                                | 21,54                                | 14,94 |
| CWCW         | 7,98                                                | 6,91                                   | 7,31                                 | 7,31                                 | 5,52                                 | 13,32 |
| O_CCCC       | 0,59                                                | 0,00                                   | 0,20                                 | 0,20                                 | 0,00                                 | 14,62 |
| O_CWCW       | 0,00                                                | 0,38                                   | 0,00                                 | 0,00                                 | 1,10                                 | 14,62 |

| Conformation | $E_{\text{int}}^{\text{elect}}$<br>kcal.mol <sup>-1</sup> | $E_{\text{int}}^0$ kcal.mol <sup>-1</sup> | $\Delta G_{\text{int}}$ kcal.mol <sup>-1</sup> |
|--------------|-----------------------------------------------------------|-------------------------------------------|------------------------------------------------|
| CCCC         | -138,44 (+15,70)                                          | -137,26 (+15,70)                          | -124,31 (+15,70)                               |
| CCCW         | -140,94 (+15,60)                                          | -138,15 (+15,60)                          | -124,61 (+15,60)                               |
| CWCC         | -117,97 (+14,94)                                          | -116,63 (+14,94)                          | -102,75 (+14,94)                               |
| CWCW         | -135,43 (+13,32)                                          | -133,38 (+13,32)                          | -120,33 (+13,32)                               |
| O_CCCC       | -160,40 (+14,62)                                          | -155,76 (+14,62)                          | -136,69 (+14,62)                               |
| O_CWCW       | -158,68 (+14,62)                                          | -155,43 (+14,62)                          | -139,27 (+14,62)                               |

**Table S17.** Thermodynamic parameters for the six studied conformers of native  $\beta$ -CD interacting with two lithium. Basis Set Superposition Errors (BSSE) was indicated in brackets.

| Conformation | $\Delta E_{\text{elect}}$<br>kcal.mol <sup>-1</sup> | $\Delta E_0$<br>kcal.mol <sup>-1</sup> | $\Delta E$<br>kcal.mol <sup>-1</sup> | $\Delta H$<br>kcal.mol <sup>-1</sup> | $\Delta G$<br>kcal.mol <sup>-1</sup> | BSSE  |
|--------------|-----------------------------------------------------|----------------------------------------|--------------------------------------|--------------------------------------|--------------------------------------|-------|
| CCCC         | 3,70                                                | 3,58                                   | 3,59                                 | 3,59                                 | 2,95                                 | 15,93 |
| CCCW         | 3,20                                                | 3,94                                   | 3,60                                 | 3,60                                 | 4,03                                 | 15,26 |
| CWCC         | 19,68                                               | 19,59                                  | 19,59                                | 19,59                                | 19,66                                | 15,77 |
| CWCW         | 6,72                                                | 6,44                                   | 6,59                                 | 6,59                                 | 5,20                                 | 13,11 |
| O_CCCC       | 0,00                                                | 0,00                                   | 0,00                                 | 0,00                                 | 0,00                                 | 14,90 |
| O_CWCW       | 0,63                                                | 1,36                                   | 0,90                                 | 0,90                                 | 1,75                                 | 14,52 |

| Conformation | $E_{\text{int}}^{\text{elect}}$<br>kcal.mol <sup>-1</sup> | $E_{\text{int}}^0$ kcal.mol <sup>-1</sup> | $\Delta G_{\text{int}}$ kcal.mol <sup>-1</sup> |
|--------------|-----------------------------------------------------------|-------------------------------------------|------------------------------------------------|
| CCCC         | -112,34 (+15,93)                                          | -111,91(+15,93)                           | -98,71 (+15,93)                                |
| CCCW         | -115,63 (+15,26)                                          | -113,64 (+15,26)                          | -99,64 (+15,26)                                |
| CWCC         | -96,24 (+15,77)                                           | -95,73 (+15,77)                           | -81,65 (+15,77)                                |
| CWCW         | -111,89 (+13,11)                                          | -110,72 (+13,11)                          | -97,67 (+13,11)                                |
| O_CCCC       | -136,20 (+14,90)                                          | -132,64 (+14,90)                          | -113,71 (+14,90)                               |
| O_CWCW       | -133,26 (+14,52)                                          | -131,33 (+14,52)                          | -115,65 (+14,52)                               |

**Table S18.** Thermodynamic parameters for the six studied conformers of native  $\beta$ -CD interacting with one lithium and one sodium. Basis Set Superposition Errors (BSSE) was indicated in brackets.

| Conformation | $\Delta E_{\text{elect}}$<br>kcal.mol <sup>-1</sup> | $\Delta E_0$<br>kcal.mol <sup>-1</sup> | $\Delta E$<br>kcal.mol <sup>-1</sup> | $\Delta H$<br>kcal.mol <sup>-1</sup> | $\Delta G$<br>kcal.mol <sup>-1</sup> | BSSE  |
|--------------|-----------------------------------------------------|----------------------------------------|--------------------------------------|--------------------------------------|--------------------------------------|-------|
| CCCC         | 73,78                                               | 75,91                                  | 75,22                                | 75,22                                | 78,68                                | 10,20 |
| CCCW         | 65,81                                               | 66,40                                  | 66,00                                | 66,00                                | 66,06                                | 12,60 |
| CWCC         | 21,38                                               | 21,47                                  | 21,63                                | 21,63                                | 22,28                                | 10,66 |
| CWCW         | 20,10                                               | 19,12                                  | 19,43                                | 19,43                                | 18,61                                | 12,34 |
| O_CCCC       | 76,62                                               | 78,60                                  | 77,74                                | 77,74                                | 82,36                                | 10,24 |
| O_CWCW       | 0,00                                                | 0,00                                   | 0,00                                 | 0,00                                 | 0,00                                 | 11,75 |

| Conformation | $E_{\text{int}}^{\text{elect}}$<br>kcal.mol <sup>-1</sup> | $E_{\text{int}}^0$ kcal.mol <sup>-1</sup> | $\Delta G_{\text{int}}$ kcal.mol <sup>-1</sup> |
|--------------|-----------------------------------------------------------|-------------------------------------------|------------------------------------------------|
| CCCC         | -154,52 (+10,20)                                          | -129,19 (+10,20)                          | -111,17 (+10,20)                               |
| CCCW         | -156,80 (+12,60)                                          | -121,31 (+12,60)                          | -106,53 (+12,60)                               |
| CWCC         | -175,52 (+10,66)                                          | -164,02 (+10,66)                          | -145,17 (+10,66)                               |
| CWCW         | -187,04 (+12,34)                                          | -160,89 (+12,34)                          | -144,05 (+12,34)                               |
| O_CCCC       | -144,74 (+10,24)                                          | -156,85 (+10,24)                          | -140,44 (+10,24)                               |
| O_CWCW       | -187,14 (+11,75)                                          | -151,55 (+11,75)                          | -134,31 (+11,75)                               |

**Table S19.** Thermodynamic parameters for the six studied conformers of per-2,3,6-O-dimethyl  $\beta$ -CD (TRIMEB) interacting with two lithium. Basis Set Superposition Errors (BSSE) was indicated in brackets.

| Conformation | $\Delta E_{\text{élect}}$<br>kcal.mol <sup>-1</sup> | $\Delta E_0$<br>kcal.mol <sup>-1</sup> | $\Delta E$<br>kcal.mol <sup>-1</sup> | $\Delta H$<br>kcal.mol <sup>-1</sup> | $\Delta G$<br>kcal.mol <sup>-1</sup> | BSSE  |
|--------------|-----------------------------------------------------|----------------------------------------|--------------------------------------|--------------------------------------|--------------------------------------|-------|
| cccc         | 71,03                                               | 73,34                                  | 72,56                                | 72,56                                | 76,26                                | 11,84 |
| cccw         | 69,79                                               | 70,62                                  | 70,16                                | 70,16                                | 70,06                                | 13,34 |
| cwcc         | 15,32                                               | 15,35                                  | 15,61                                | 15,61                                | 15,81                                | 12,30 |
| cwcw         | 10,50                                               | 10,23                                  | 10,27                                | 10,27                                | 10,84                                | 14,11 |
| o_cccc       | 52,85                                               | 54,68                                  | 53,85                                | 53,85                                | 57,81                                | 12,04 |
| o_cwcw       | 0,00                                                | 0,00                                   | 0,00                                 | 0,00                                 | 0,00                                 | 13,47 |

| Conformation | $E_{\text{int}}^{\text{elect}}$<br>kcal.mol <sup>-1</sup> | $E_{\text{int}}^0$ kcal.mol <sup>-1</sup> | $\Delta G_{\text{int}}$ kcal.mol <sup>-1</sup> |
|--------------|-----------------------------------------------------------|-------------------------------------------|------------------------------------------------|
| cccc         | -132,71 (+11,84)                                          | -128,55 (+11,84)                          | -111,05 (+11,84)                               |
| cccw         | -128,25 (+13,34)                                          | -124,83 (+13,34)                          | -108,92 (+13,34)                               |
| cwcc         | -157,02 (+12,30)                                          | -152,50 (+12,30)                          | -133,72 (+12,30)                               |
| cwcw         | -172,09 (+14,11)                                          | -168,06 (+14,11)                          | -149,04 (+14,11)                               |
| o_cccc       | -143,94 (+12,04)                                          | -139,63 (+12,04)                          | -120,44 (+12,04)                               |
| o_cwcw       | -162,58 (+13,47)                                          | -158,02 (+13,47)                          | -139,68 (+13,47)                               |

**Table S20.** Thermodynamic parameters for the six studied conformers of per-2,3,6-O-dimethyl  $\beta$ -CD (TRIMEB) interacting with one lithium and one sodium. Basis Set Superposition Errors (BSSE) was indicated in brackets.
